# Supplementary material
Source: PubMed Central journal article supplement (PMC3319871)
Supplement: NIHMS366066-supplement-SI.pdf [file NIHMS366066-supplement-SI.pdf]

## Supporting Information

### Experimental section

**Reagents and Materials.** The mammalian cell lysis kit, phosphate buffered saline (PBS), hydrocortisone, insulin, cholera toxin and calcium chloride were obtained from Sigma-Aldrich (Saint Louis, MI). M13mp18 single-stranded DNA and Lambda DNA were purchased from New England Biolabs Inc (Ipswich, MA). All of the DNA helper strands were synthesized by Integrated DNA Technologies (Coralville, IA) and normalized to 100  $\mu$ M in 96 well plates without further purification. Synthetic  $\beta$ -actin RNA was also purchased from IDT and purified by RNase-free HPLC in factory. Total RNA isolation kit, RNase-free DNase, and RNA fragmentation reagent were obtained from Ambion (Austin, TX). Dulbecco's Modified Eagle's Medium (DMEM), DMEM: F12 medium, keratinocyte serum-free medium, horse serum, human recombinant Epidermal Growth Factor (hrEGF), fetal bovine serum (FBS), penicillin/streptomycin solution, Bovine Pituitary Extract (BPE), trypsin, agarose and SYBR Green I were purchased from Invitrogen (Carlsbad, CA).

**Assembly of DNA Origami.** M13 viral ssDNA (10 nM or 20 nM) was mixed with the corresponding set of helper strands at a molar ratio of 1:5 or 1:10 in 1 x TAE/Mg buffer containing 100 mM Tris, 50 mM acetic acid, 5 mM EDTA and 12.5 mM magnesium acetate (pH 8.0) to form the 2D rectangular, 2D triangular, or 3D cuboid origami, respectively. The origami samples were annealed and assembled in an Eppendorf thermocycler (Hauppauge, NY) from 94 °C to room temperature over 12 h or 24 h for the 2D or 3D origami. Excess helper strands were removed using Microcon centrifuge filters YM-100 (Millipore, Bedford, MA).

**Cell Lines.** CP-A cells (metaplastic human esophageal epithelial cell line) were kindly provided by Dr. Brian J. Reid at the Fred Hutchison Cancer Research Center. MCF-10A (non-tumorigenic mammary epithelial cell line) and MDA-MB-231 cells (metastatic breast cancer cell line) were provided by Dr. Thea Tlsty, University of California, San Francisco. HeLa (human cervical cancer cell line) and End1/E6E7 (normal endocervical epithelial cell line) were purchased from American Type Culture Collection (ATCC, Manassas, VA).

**Cell Cultures:** CP-A cells were cultured in keratinocyte serum-free medium supplemented with BPE and hrEGF. End1/E6E7 cells were grown in the same medium for CP-A cells plus calcium chloride (0.013 g/L). HeLa and MDA-MB-231 cells were cultured in DMEM medium supplemented with 10% FBS and 100 unit/mL penicillin: 100 µg/mL streptomycin solutions. MCF-10A cells were cultured in DMEM: F12 medium supplemented with 5% horse serum, 0.5 µg/mL hydrocortisone, 20 ng/mL hrEGF, 10 µg/mL insulin, 100ng/mL cholera toxin and 100 unit/mL penicillin:100 µg/mL streptomycin solutions. All the cells were cultured in 25 or 75 cm<sup>2</sup> flasks to ~ 80% confluency and incubated at 37 °C under 5% CO<sub>2</sub> atmosphere.

**Cell Lysis.** The lysis solution contains 50 mM Tris-HCl, 150 mM NaCl, 0.1% SDS, 0.5% deoxycholic acid and protease inhibitor at the ratio of 1:100. Cells were washed with PBS and detached from the flask with 0.05% trypsin for CP-A, MDA-MB-231 and MCF-10A cells and with 0.25% trypsin for HeLa and End1/E6E7 cells. After trypsin treatment, cells were centrifuged at 900 rpm for 3 minutes and resuspended in 1mL of 1X PBS. Cells (10<sup>6</sup>) were lysed in 500 uL of the lysis solution and incubated on ice for 20 min on a shaker. The lysates were then centrifuged at 17000 x g at 4 °C for 30 min. Finally, the supernatant was removed and stored on ice or -20 °C for the following steps.

**Separation of Rectangular Origami from CP-A Cell Lysates.** Purified rectangular DNA origami was mixed with various concentrations of CP-A cell lysate for 1 h and 12 h on a shaker. The stability of origami was first verified by gel electrophoresis. 1% agarose slab gel containing SYBR Green I dye was prepared in 1X TAE/Mg buffer, and then immersed in the same buffer. The origami-cell lysate mixture was loaded in the gel sample wells, followed by electrophoresis for 2 h at 80 V. After electrophoresis, the gel was rinsed and imaged with a Gel Doc XR system (Bio-Rad, Hercules, CA). The band intensity was measured using Image J (National Institutes of Health, <http://rsb.info.nih.gov/ij>). The migration bands corresponding to assembled origami were excised from the gel for AFM imaging. Gel bands were crushed and transferred into DNA gel extraction spin column (Bio-Rad). DNA origami was recovered by centrifuging the column for 5 minutes at 13000 g.

**Mixing Triangular and 3D Cuboid Origami with Cell Lysates.** Purified triangular and 3D cuboid origami were mixed with CP-A cell lysates at room temperature for 1 h and 12 h, respectively. The sample mixtures were analyzed by agarose gel electrophoresis. The origami bands were subsequently excised from the gel and recovered. The structural integrity of the triangular and 3D cuboid origami was confirmed by AFM and TEM imaging, respectively.

**Separation of Rectangular Origami, M13 ssDNA and  $\lambda$  DNA from Cell Lysates.** 10 nM of rectangular origami and M13 viral ssDNA and 100 nM  $\lambda$  DNA were added to CP-A cell lysates (5,000 or 10,000 cells) at room temperature for 1 h and 12 h respectively. Agarose gel electrophoresis was used to separate them from the cell lysate components to determine their stability (Figure 4 in the main text). In addition, these three DNA samples were mixed with other cell lysates, including HeLa, End1/E6E7, MDA-MB-231 and MCF-10A. The mixtures were

loaded into agarose slab gels followed by electrophoresis. The gel images of three DNA structures after incubation with the various cell lysates are shown in **Figure S2**. The results show that only DNA origami can be separated from the cell lysate in all cell lines.  $\lambda$  DNA showed a strong interaction with all types of cell lysate, nonspecifically shifting the bands into the gel loading wells, while the ssDNA smeared and displayed some degree of random degradation.

**Preparation of Total Cellular RNA.** Total RNA was extracted from HeLa cell lines and prepared by total RNA isolation kit, according to the manufacturer's instructions. Genomic DNA was removed by treating samples with RNase-free DNase. The purified RNA was kept at  $-80^{\circ}\text{C}$  for future use or fragmented using RNA fragmentation reagent.

**AFM Imaging.** The rectangular and triangular origami extracted from the gel (2  $\mu\text{L}$ ) was deposited onto a freshly cleaved mica (Ted Pella) and left to adsorb for 2 minutes. 1 X TAE/Mg buffer (30  $\mu\text{L}$ ) was added to the AFM liquid cell, and the samples were scanned in tapping mode under fluid on an AFM (Digital Instruments, Veeco, Bruker, Santa Barbara, CA) with SNL-tips (Veeco).

**TEM Imaging.** The TEM sample was prepared by dropping 2  $\mu\text{L}$  of 3D origami sample solution on carbon-coated grid (400 mesh, Ted Pella). Before depositing the sample, the grids were negatively glow discharged using Emitech K100X machine. After 45 seconds, the sample was wicked from the grid by filter paper. The grid was then washed with a drop of water to remove excess salt. A drop of 0.7 % uranyl formate solution was added to the grid, and excess solution was again wicked away with filter paper. The grid was treated with a second drop of uranyl formate solution for 15 seconds, and the excess solution wicked away. The grid was evaporated

to dryness at room temperature. Low resolution TEM studies were carried out by using a Philips CM12 transmission electron microscope, operated at 80 kV in the bright field mode.

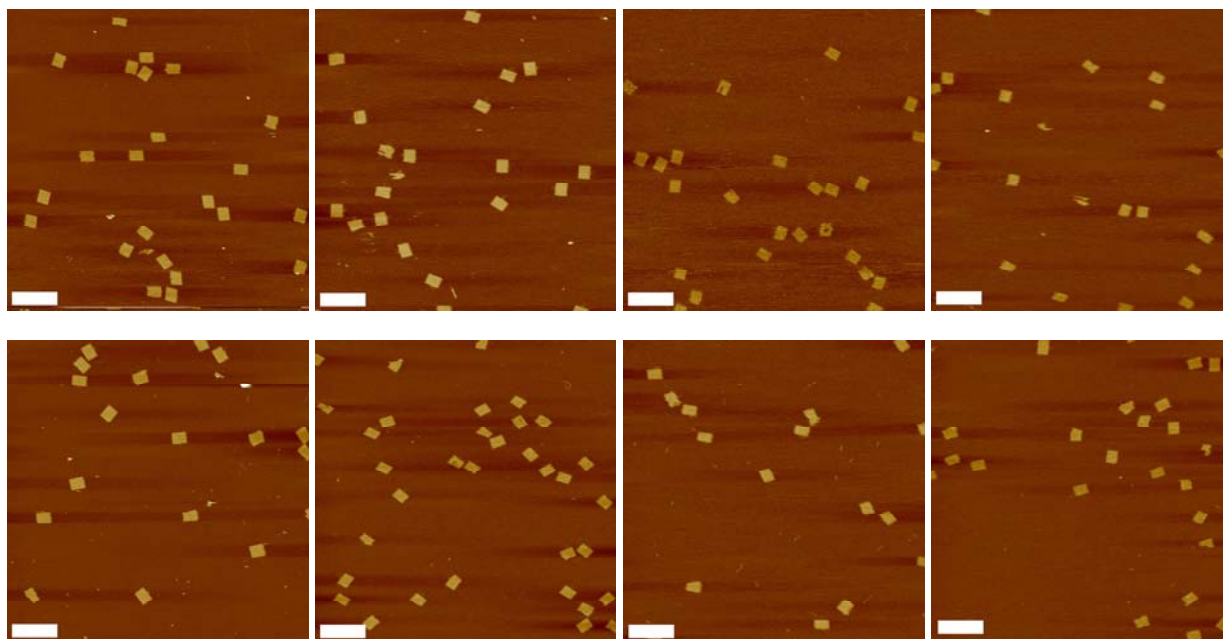

**Figure S1.** Additional AFM images of rectangular origami extracted from gels of Figure 2a. The top row is origami-cell lysate mixture incubated at 4°C and bottom row is incubation at room temperature. Left to right: 5000 lysed cells incubated with origami for 12 h, 10000 lysed cells incubated with origami for 12 h, 5000 lysed cells incubated with origami for 1 h and 10000 lysed cells incubated with origami for 1 h. Scale bar= 300 nm.

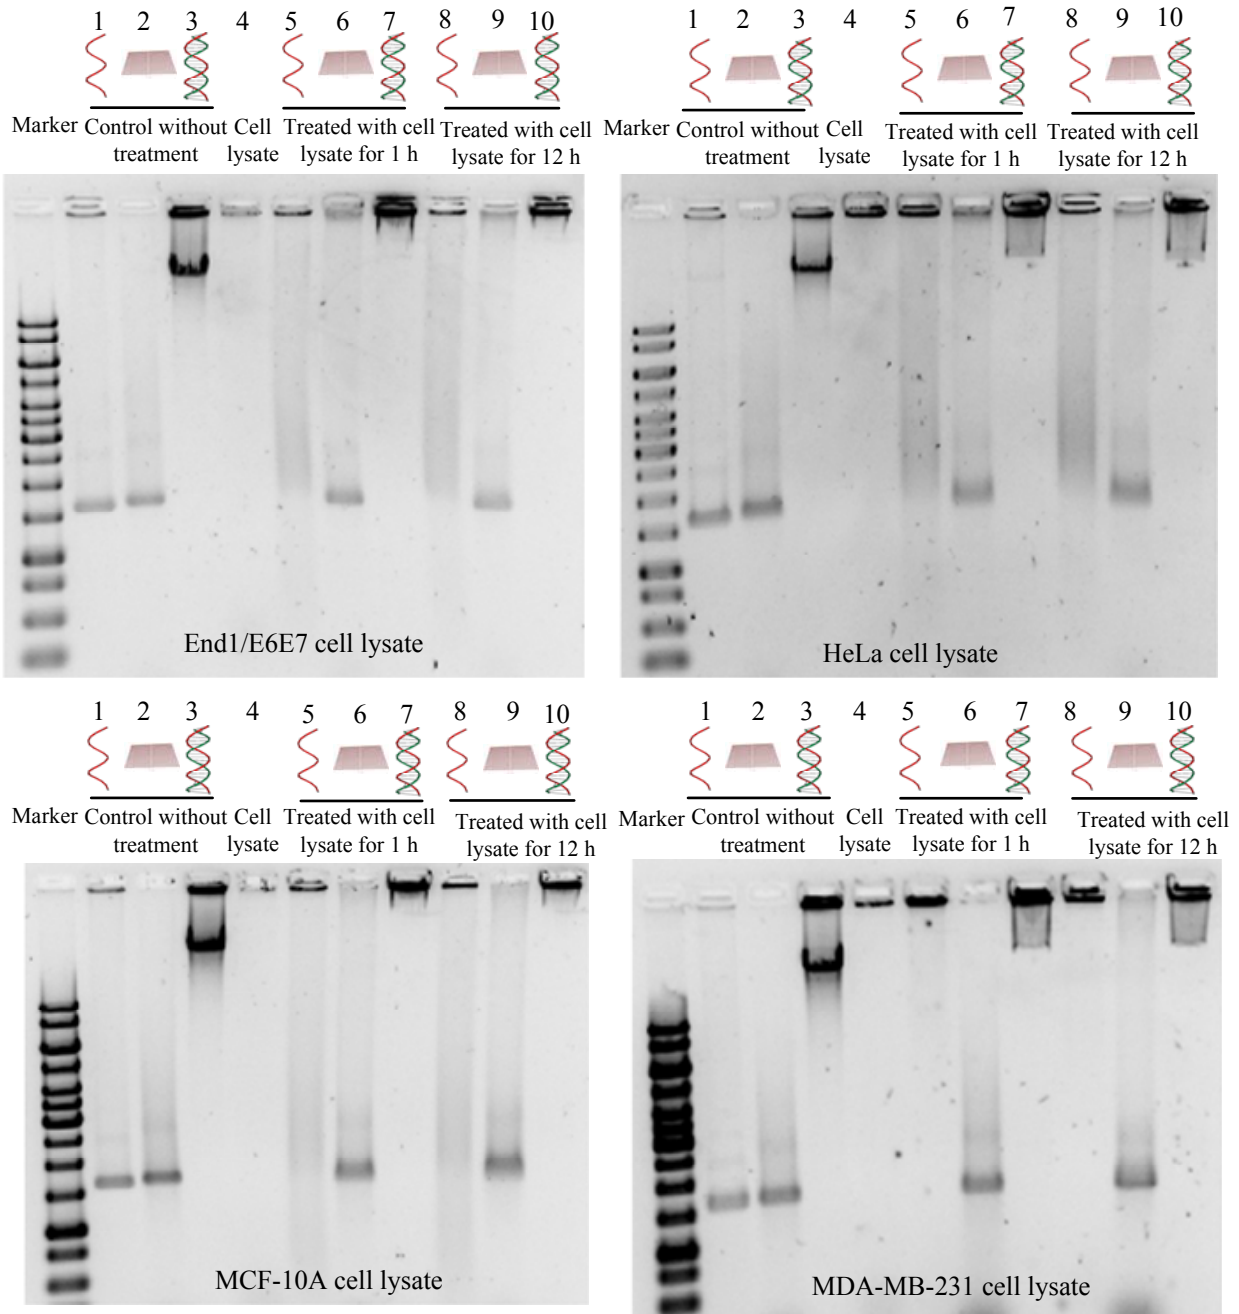

**Figure S2.** Effects of cell line on the stability of M13, rectangular origami, viral ss DNA and  $\lambda$  DNA as determined by agarose gel electrophoresis. Leftmost lane: 1 kbp DNA marker; Lane 1: 10 nM M13 ssDNA; Lane 2: 10 nM origami; Lane 3: 100 nM  $\lambda$  DNA; Lane 4: cell lysate; Lane 5-7: M13, origami and  $\lambda$  DNA incubated with cell lysate for 1 h at 25°C; Lane 8-10: M13, origami and  $\lambda$  DNA incubated with cell lysate for 12 h at 25°C.

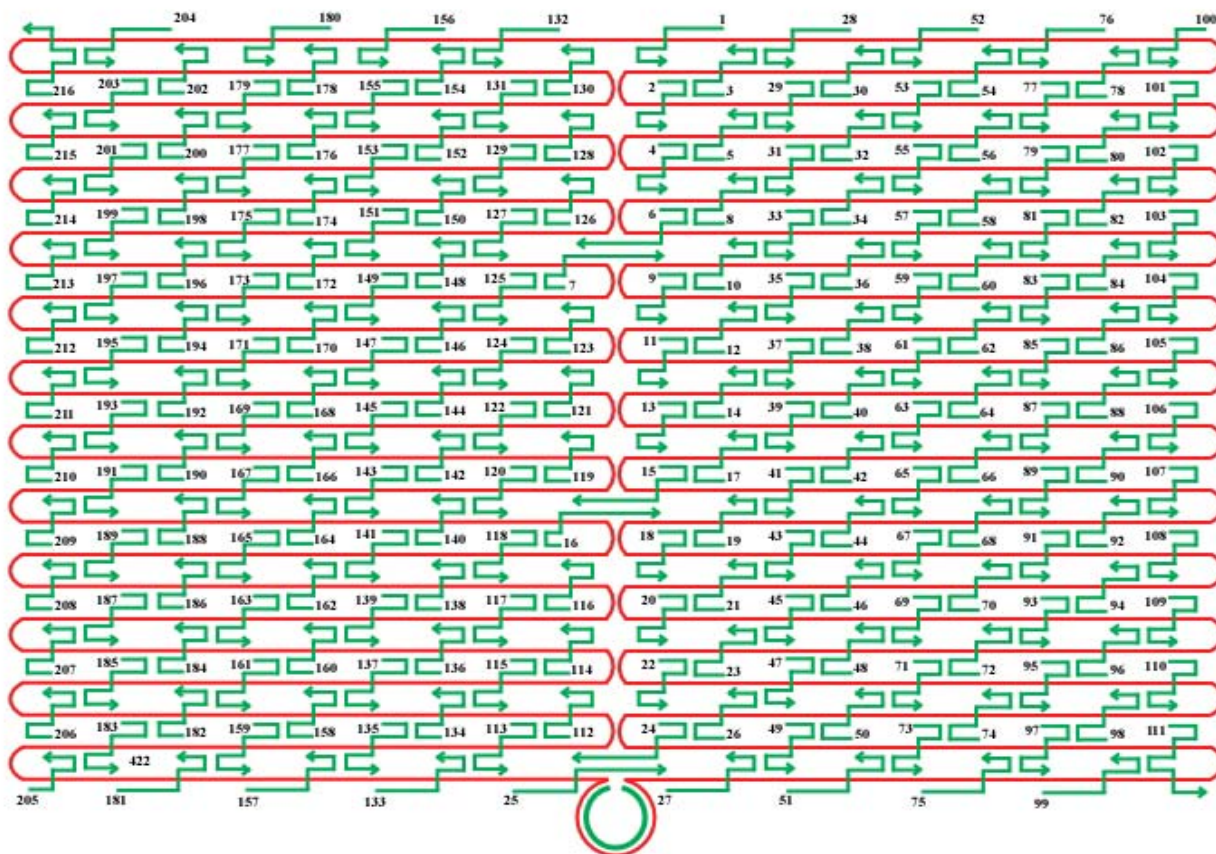

**Figure S3.** Schematic rectangular DNA origami with staple strands numbered. Single stranded, M13 viral DNA is shown in red, and staple strands are shown in green.



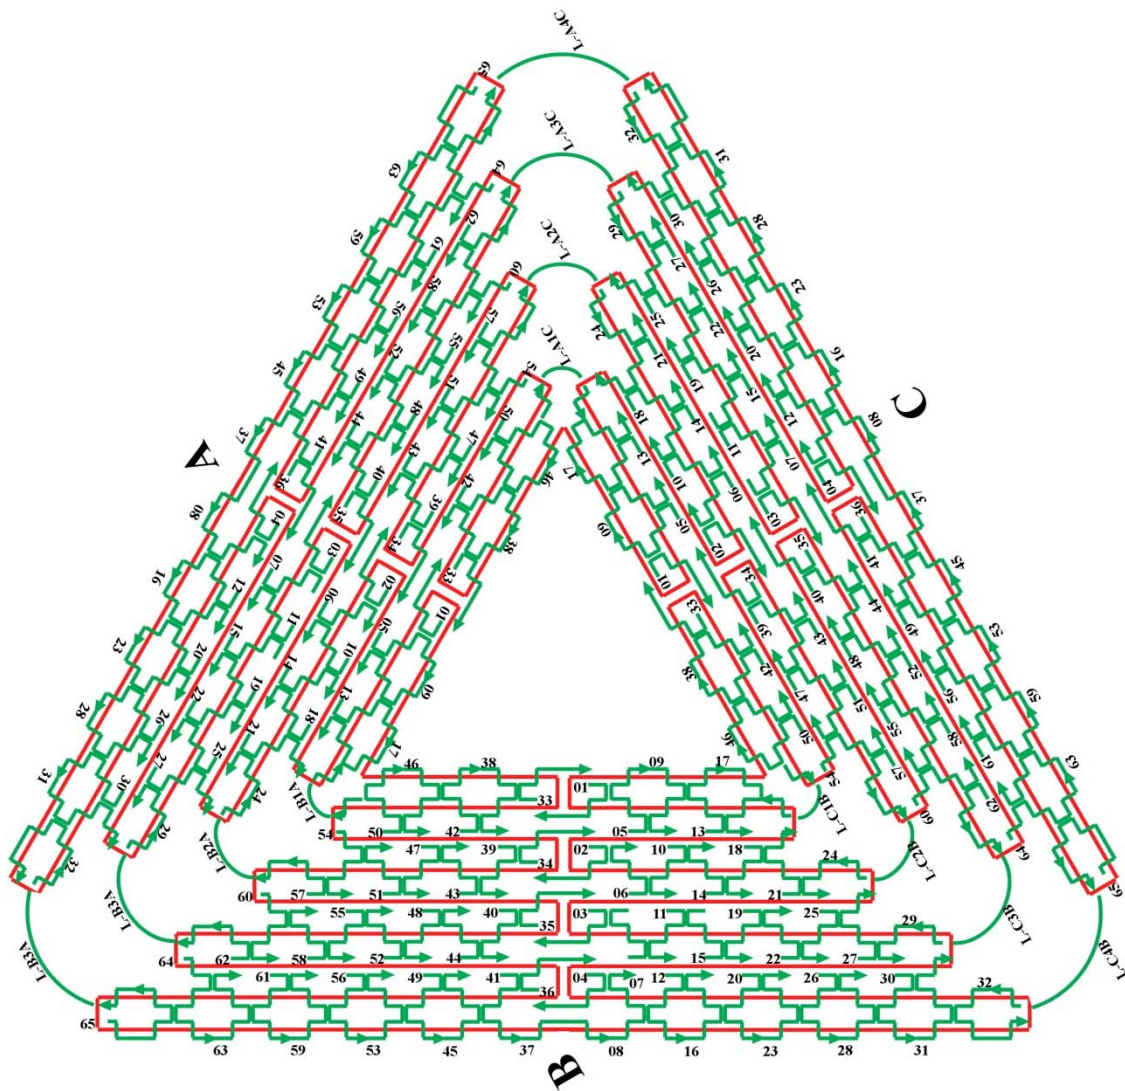

**Figure S4.** Schematic 2D triangular DNA origami with staple strands numbered. Single stranded, M13 viral DNA is shown in red, and staple strands are shown in green. The complex consists of three major domains which are labeled A, B and C.

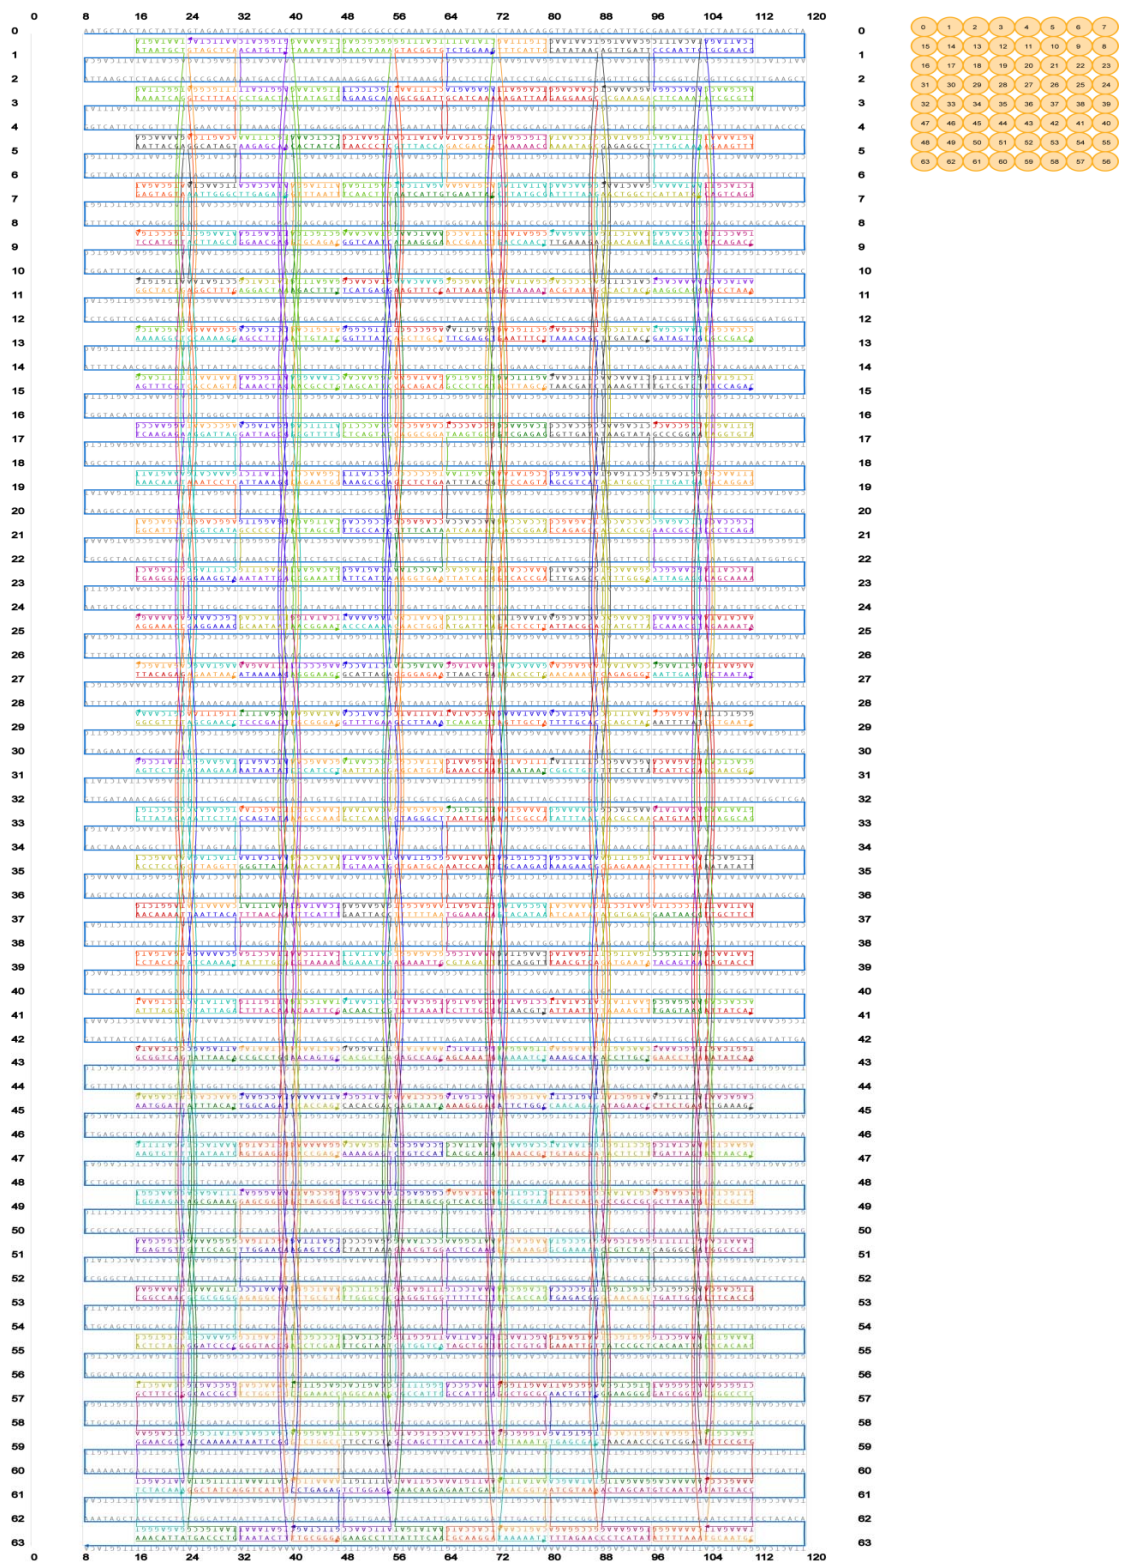

Figure S5. Schematic design of 8-layer 3D origami.

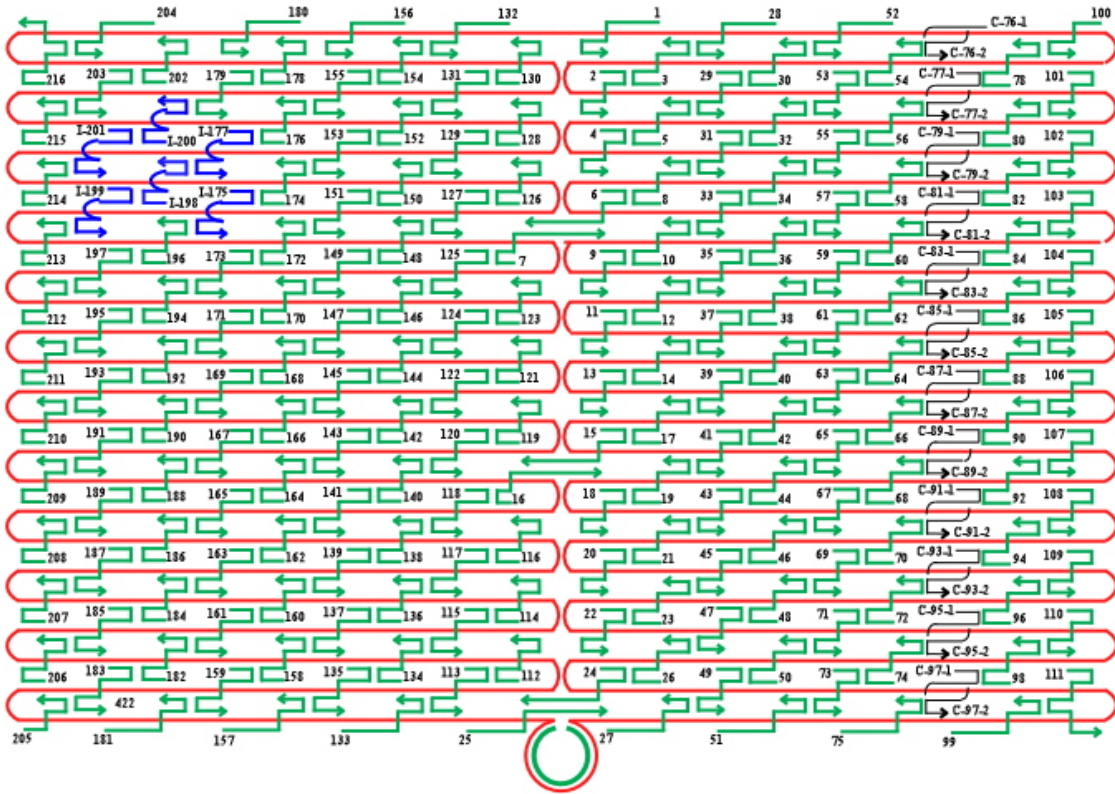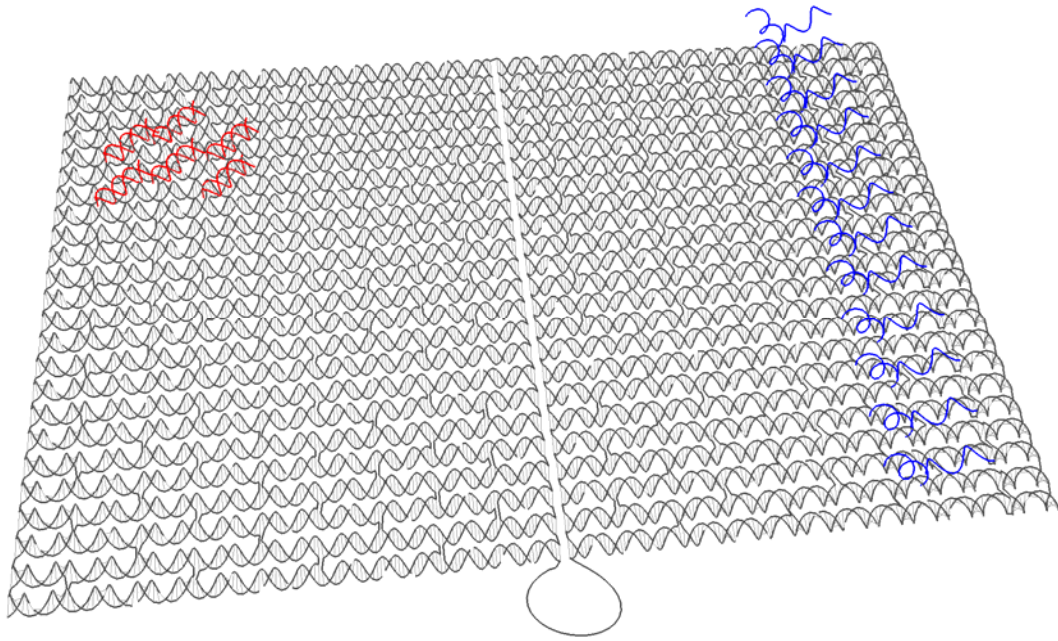

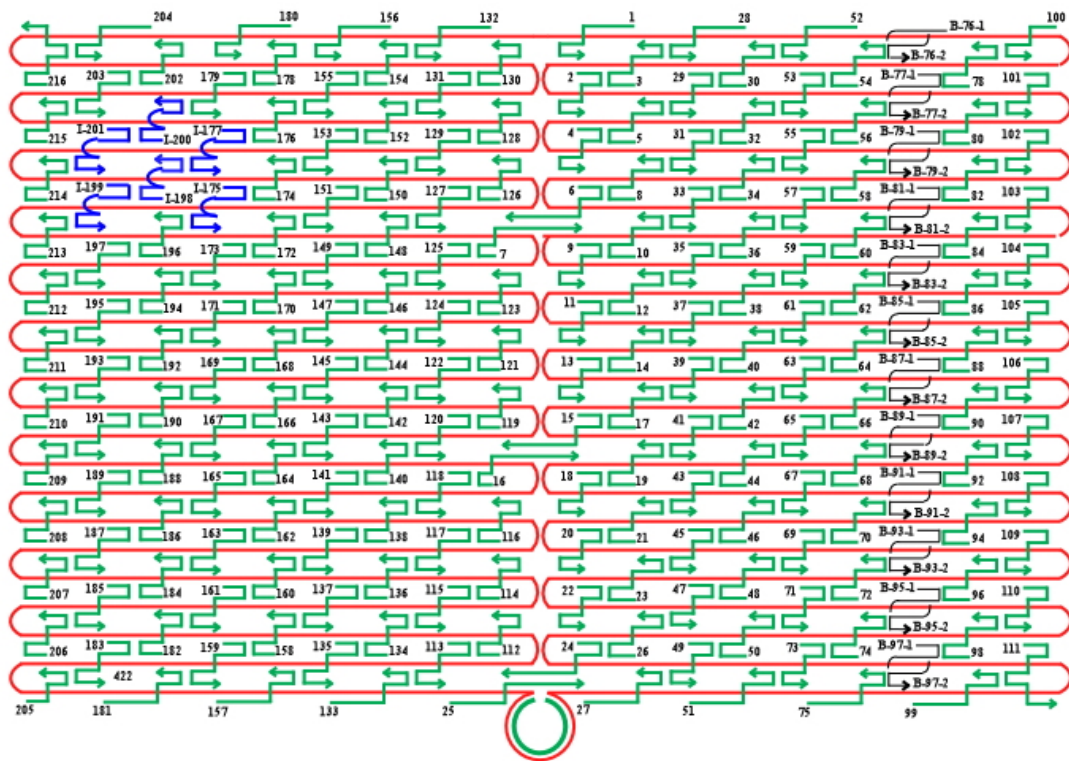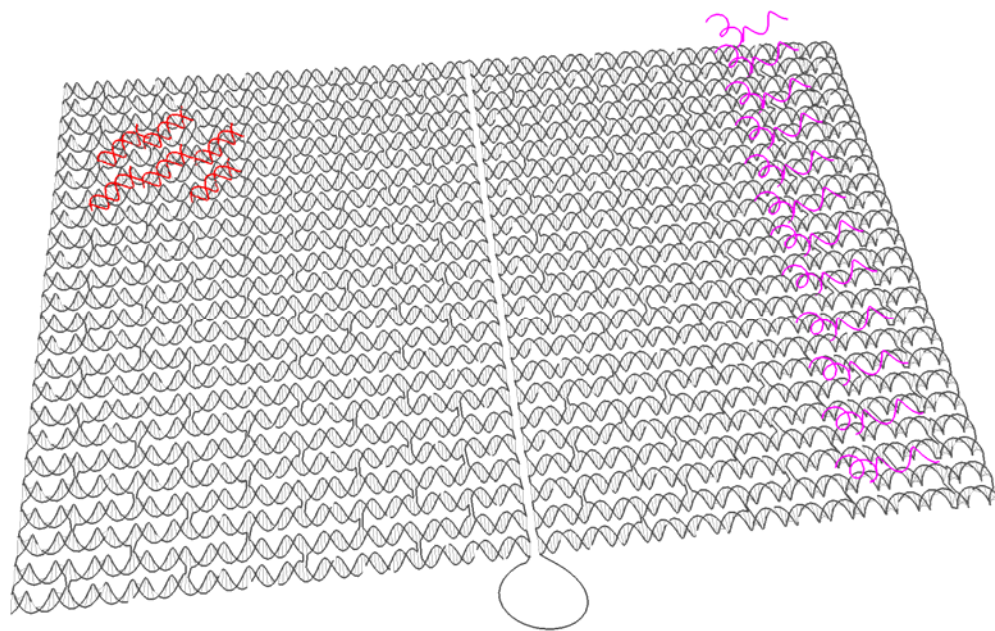

**Figure S6.** Schematic layout of the origami/probes showing the positions of Index (initiate with 'I'), Control probes (initiate with 'C'), and  $\beta$ -actin probes (initiate with 'B'). The 3D structures of the origami/probes are also shown below each design.

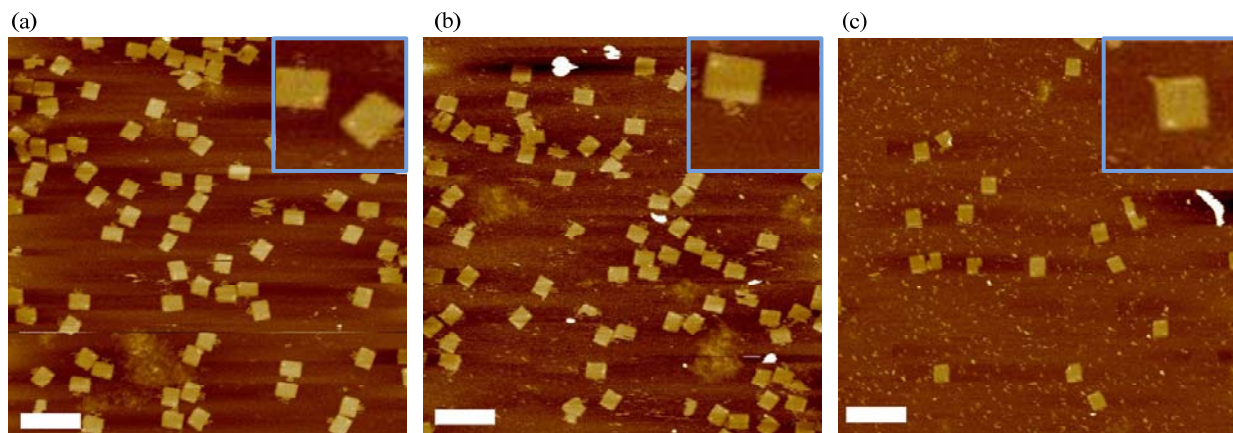

**Figure S7.** AFM images of origami bearing control probe reacted with (a) Synthetic RNA, (b) Fragmentized total cellular RNA, and (c) total cellular RNA. Scale bar= 300 nm. (image insets are 250 nm by 250 nm)

## Staple strand sequence

**Table S1. Staple sequences for 2D rectangular origami**

| Name | Sequence                            |
|------|-------------------------------------|
| 1    | CAAGCCCAATAGGAAC CCATGTACAAACAGTT   |
| 2    | AATGCCCCGTAACAGT GCCCGTATCTCCCTCA   |
| 3    | TGCCTTGACTGCCTAT TTCGGAACAGGGATAG   |
| 4    | GAGCCGCCCCACCACC GGAACCGCGACGGAAA   |
| 5    | AACCAGAGACCCTCAG AACCGCCAGGGGTCAG   |
| 6    | TTATTCATAGGGAAGG TAAATATT CATTTCAGT |
| 7    | CATAACCCGAGGCATA GTAAGAGC TTTTAAAG  |
| 8    | ATTGAGGGTAAAGGTG AATTATCAATCACCGG   |
| 9    | AAAAGTAATATCTTAC CGAAGCCCTTCCAGAG   |
| 10   | GCAATAGCGCAGATAG CCGAACAATTCAACCG   |
| 11   | CCTAATTTACGCTAAC GAGCGTCTAATCAATA   |
| 12   | TCTTACCAGCCAGTTA CAAAATAAATGAAATA   |
| 13   | ATCGGCTGCGAGCATG TAGAAACCTATCATAT   |
| 14   | CTAATTTATCTTTCCT TATCATTTCATCCTGAA  |
| 15   | GCGTTATAGAAAAAGC CTGTTTAG AAGGCCGG  |
| 16   | GCTCATTTTTCGCATT AATTTTTG AGCTTAGA  |
| 17   | AATTACTACAAATTCT TACCAGTAATCCCATC   |
| 18   | TTAAGACGTTGAAAAC ATAGCGATAACAGTAC   |
| 19   | TAGAATCCCTGAGAAG AGTCAATAGGAATCAT   |
| 20   | CTTTTACACAGATGAA TATACAGTAAACAATT   |
| 21   | TTTAACGTTTCGGGAGA AACATAATTTTCCCT   |
| 22   | CGACAATAAGTATTA GACTTTACAATACCGA    |
| 23   | GGATTTAGCGTATTAA ATCCTTTGTTTTTCAGG  |
| 24   | ACGAACCAAAAACATCG CCATTAAT TGGTGGTT |
| 25   | GAACGTGGCGAGAAAG GAAGGGAA CAAACTAT  |
| 26   | TAGCCCTACCAGCAGA AGATAAAAACATTTGA   |
| 27   | CGGCCTTGCTGGTAAT ATCCAGAACGAACTGA   |
| 28   | CTCAGAGCCACCACC TCATTTTCCTATTATT    |
| 29   | CTGAAACAGGTAATAA GTTTTAACCCCTCAGA   |
| 30   | AGTGTACTTGAAAGTA TTAAGAGGCCGCCACC   |
| 31   | GCCACCACTCTTTTCA TAATCAAACCGTCACC   |
| 32   | GTTTGCCACCTCAGAG CCGCCACCGATACAGG   |
| 33   | GACTTGAGAGACAAAA GGGCGACAAGTTACCA   |
| 34   | AGCGCCAACCATTTGG GAATTAGATTATTAGC   |
| 35   | GAAGGAAAATAAGAGC AAGAAACAACAGCCAT   |
| 36   | GCCCAATACCGAGGAA ACGCAATAGGTTTACC   |
| 37   | ATTATTTAACCAGCT ACAATTTTCAAGAACG    |
| 38   | TATTTTGCTCCCAATC CAAATAAGTGAGTTAA   |
| 39   | GGTATTAAGAACAAGA AAAATAATTAAAGCCA   |

---

40 TAAGTCCTACCAAGTA CCGCACTCTTAGTTGC  
41 ACGCTCAAATAAGAA TAAACACCGTGAATTT  
42 AGGCGTTACAGTAGGG CTTAATTGACAATAGA  
43 ATCAAAATCGTCGCTA TTAATTAACGGATTCG  
44 CTGTAAATCATAGGTC TGAGAGACGATAAATA  
45 CCTGATTGAAAGAAAT TGCGTAGACCCGAACG  
46 ACAGAAATCTTTGAAT ACCAAGTTCCTTGCTT  
47 TTATTAATGCCGTCAA TAGATAATCAGAGGTG  
48 AGATTAGATTTAAAAG TTTGAGTACACGTAAA  
49 AGGCGGTCATTAGTCT TTAATGCGCAATATTA  
50 GAATGGCTAGTATTAA CACCGCCTCAACTAAT  
51 CCGCCAGCCATTGCAA CAGGAAAAATATTTTT  
52 CCCTCAGAACCGCCAC CCTCAGAACTGAGACT  
53 CCTCAAGAATACATGG CTTTTGATAGAACCAC  
54 TAAGCGTCGAAGGATT AGGATTAGTACCGCCA  
55 CACCAGAGTTCGGTCA TAGCCCCCGCCAGCAA  
56 TCGGCATTCCGCCGCC AGCATTGACGTTCCAG  
57 AATCACCAAATAGAAA ATTCATATATAACGGA  
58 TCACAATCGTAGCACC ATTACCATCGTTTTCA  
59 ATACCCAAGATAACCC ACAAGAATAAACGATT  
60 ATCAGAGAAAGAAGTGCATGATTTTTATTTG  
61 TTTTGTAAAGCCTTA AATCAAGAATCGAGAA  
62 AGGTTTTGAACGTCAA AAATGAAAGCGCTAAT  
63 CAAGCAAGACGCGCCT GTTTATCAAGAATCGC  
64 AATGCAGACCGTTTTT ATTTTCATCTTGCGGG  
65 CATATTTAGAAATACC GACCGTGTTACCTTTT  
66 AATGGTTTACAACGCC AACATGTAGTTCAGCT  
67 TAACCTCCATATGTGA GTGAATAAACAAAATC  
68 AAATCAATGGCTTAGG TTGGGTTACTAAATTT  
69 GCGCAGAGATATCAAA ATTATTTGACATTATC  
70 AACCTACCGCGAATTA TTCATTTCCAGTACAT  
71 ATTTTGCGTCTTTAGG AGCACTAAGCAACAGT  
72 CTAAAATAGAACAAAG AAACCACCAGGGTTAG  
73 GCCACGCTATACGTGG CACAGACAACGCTCAT  
74 GCGTAAGAGAGAGCCA GCAGCAAAAAGGTTAT  
75 GGAAATACCTACATTT TGACGCTCACCTGAAA  
76 TATCACCGTACTCAGG AGGTTTAGCGGGGTTT  
77 TGCTCAGTCAGTCTCT GAATTTACCAGGAGGT  
78 GGAAAGCGACCAGGCG GATAAGTGAATAGGTG  
79 TGAGGCAGGCGTCAGA CTGTAGCGTAGCAAGG  
80 TGCCTTTAGTCAGACG ATTGGCCTGCCAGAAT  
81 CCGGAAACACACCACG GAATAAGTAAGACTCC  
82 ACGCAAAGGTCACCAA TGAAACCAATCAAGTT  
83 TTATTACGGTCAGAGG GTAATTGAATAGCAGC  
84 TGAACAAACAGTATGT TAGCAAATAAAAGAA

---

---

85 CTTTACAGTTAGCGAA CCTCCCGACGTAGGAA  
86 GAGGCGTTAGAGAATA ACATAAAAGAACACCC  
87 TCATTACCCGACAATA AACAACATATTTAGGC  
88 CCAGACGAGCGCCCAA TAGCAAGCAAGAACGC  
89 AGAGGCATAATTCAT CTTCTGACTATAACTA  
90 TTTTAGTTTTTCGAGC CAGTAATAAATTCTGT  
91 TATGTAAACCTTTTTT AATGGAAAAATTACCT  
92 TTGAATTATGCTGATG CAAATCCACAAATATA  
93 GAGCAAAAACCTTCTGA ATAATGGAAGAAGGAG  
94 TGGATTATGAAGATGA TGAAACAAAATTCAT  
95 CGGAATTATTGAAAGG AATTGAGGTGAAAAAT  
96 ATCAACAGTCATCATA TTCCTGATTGATTGTT  
97 CTAAAGCAAGATAGAA CCCTTCTGAATCGTCT  
98 GCCAACAGTCACCTTG CTGAACCTGTTGGCAA  
99 GAAATGGATTATTTAC ATTGGCAGACATTCTG  
100 TTTT TATAAGTA TAGCCCGGCCGTCGAG  
101 AGGGTTGA TTTT ATAAATCC TCATTAATGATATTC  
102 ACAAACAA TTTT AATCAGTA GCGACAGATCGATAGC  
103 AGCACCGT TTTT TAAAGGTG GCAACATAGTAGAAAA  
104 TACATACA TTTT GACGGGAG AATTAACACAGGGAA  
105 GCGCATT TTTT GCTTATCC GGTATTCTAAATCAGA  
106 TATAGAAG TTTT CGACAAA GGTAAGTAGAGAATA  
107 TAAAGTAC TTTT CGCGAGAA AACTTTTTATCGCAAG  
108 ACAAAGAA TTTT ATTAATTA CATTTAACACATCAAG  
109 AAAACAAA TTTT TTCATCAA TATAATCCTATCAGAT  
110 GATGGCAA TTTT AATCAATA TCTGGTCACAAATATC  
111 AAACCCTC TTTT ACCAGTAA TAAAAGGGATTACCA GTCACACG TTTT  
112 CCGAAATCCGAAAATC CTGTTTGAAGCCGGAA  
113 CCAGCAGGGGCAAAATCCCTTATAAAGCCGGC  
114 GCATAAAGTTCCACAC AACATACGAAGCGCCA  
115 GCTCACAATGTAAAGCCTGGGGTGGGTTTGCC  
116 TTCGCCATTGCCGGAA ACCAGGCATTAAATCA  
117 GCTTCTGGTCAGGCTGCGCAACTGTGTTATCC  
118 GTTAAAATTTTAACCAATAGGAACCCGGCACC  
119 AGACAGTCATTCAAAA GGGTGAGAAGCTATAT  
120 AGGTAAAGAAATCACCATCAATATAATATTTT  
121 TTTCAATTTGGTCAATA ACCTGTTTATATCGCG  
122 TCGCAAATGGGGCGCGAGCTGAAATAATGTGT  
123 TTTTAATTGCCCGAAA GACTTCAAACACTAT  
124 AAGAGGAACGAGCTTCAAAGCGAAGATACATT  
125 GGAATTACTCGTTTACCAGACGACAAAAGATT  
126 GAATAAGGACGTAACA AAGCTGCTCTAAAACA  
127 CCAAATCACTTGCCCTGACGAGAACGCCAAAA  
128 CTCATCTTGAGGCAA AGAATACAGTGAATTT  
129 AAACGAAATGACCCCGAGCGATTATTCATTAC

---



---

130 CTTAAACATCAGCTTG CTTTCGAGCGTAACAC  
131 TCGGTTTAGCTTGATACCGATAGTCCAACCTA  
132 TGAGTTTCGTCACCAGTACAACTTAATTGTA  
133 CCCCATTAGAGCTTGACGGGGAAATCAAAA  
134 GAATAGCCGCAAGCGGTCCACGCTCCTAATGA  
135 GAGTTGCACGAGATAGGGTTGAGTAAGGGAGC  
136 GTGAGCTAGTTTCCTGTGTGAAATTTGGGAAG  
137 TCATAGCTACTCACATTAATTGCGCCCTGAGA  
138 GGCATCGCACTCCAGCCAGCTTTGCCATCAA  
139 GAAGATCGGTGCGGGCCTCTTCGCAATCATGG  
140 AAATAATTTAAATTGTAAACGTTGATATTCA  
141 GCAAATATCGCGTCTGGCCTTCCTGGCCTCAG  
142 ACCGTTCTAAATGCAATGCCTGAGAGGTGGCA  
143 TATATTTTAGCTGATAAATTAATGTTGTATAA  
144 TCAATTCCTTTAGTTTGACCATTACCAGACCG  
145 CGAGTAGAACTAATAGTAGTAGCAAACCCTCA  
146 GAAGCAAAAAGCGGATTGCATCAGATAAAAA  
147 GCTTCTGGTCAGGCTGCGCAACTGTGTTATCC  
148 CCAAATATAATGCAGATACATAAACACCAGA  
149 CATTCAACGCGAGAGGCTTTTGCATATTATAG  
150 ACGAGTAGTGACAAGAACCGGATATACCAAGC  
151 AGTAATCTTAAATTGGGCTTGAGAGAATACCA  
152 GCGAAACATGCCACTACGAAGGCATGCGCCGA  
153 ATACGTAAAAGTACAACGGAGATTTTCATCAAG  
154 CAATGACACTCCAAAAGGAGCCTTACAACGCC  
155 AAAAAAGGACAACCATCGCCCACGCGGGTAAA  
156 TGTAGCATTCCACAGACAGCCCTCATCTCAA  
157 GTAAAGCACTAAATCGGAACCCTAGTTGTTCC  
158 AGTTTGGAGCCCTTACCAGCCTGGTTGCGCTC  
159 AGCTGATTACAAGAGTCCACTATTGAGGTGCC  
160 ACTGCCCGCCGAGCTCGAATTCGTTATTACGC  
161 CCCGGGTACTTTCCAGTCGGGAAACGGGCAAC  
162 CAGCTGGCGGACGACGACAGTATCGTAGCCAG  
163 GTTTGAGGGAAAGGGGGATGTGCTAGAGGATC  
164 CTTTCATCCCCAAAACAGGAAGACCGGAGAG  
165 AGAAAAGCAACATTAAATGTGAGCATCTGCCA  
166 GGTAGCTAGGATAAAAATTTTAGTTAACATC  
167 CAACGCAATTTTGGAGAGATCTACTGATAATC  
168 CAATAAATACAGTTGATTCCCAATTTAGAGAG  
169 TCCATATACATACAGGCAAGGCAACTTTATTT  
170 TACCTTTAAGGTCTTTACCCTGACAAAGAAGT  
171 CAAAATCATTGCTCCTTTTGATAAGTTTCAT  
172 TTTGCCAGATCAGTTGAGATTTAGTGGTTTAA  
173 AAAGATTCAGGGGGTAATAGTAAACCATAAAT  
174 TTTCAACTATAGGCTGGCTGACCTTGTATCAT

---

---

175 CCAGGCGCTTAATCATTGTGAATTACAGGTAG  
176 CGCCTGATGGAAGTTTCCATTAAACATAACCG  
177 TTTCATGAAAATTGTGTCGAAATCTGTACAGA  
178 ATATATTCTTTTTTCACGTTGAAAATAGTTAG  
179 AATAATAAGGTCGCTGAGGCTTGCAAAGACTT  
180 CGTAACGATCTAAAGTTTTGTGCGTGAATTGCG  
181 ACCCAAATCAAGTTTTTTGGGGTCAAAGAACG  
182 TGGACTCCCTTTTCACCAGTGAGACCTGTCGT  
183 TGGTTTTTAACGTCAAAGGGCGAAGAACCATC  
184 GCCAGCTGCCTGCAGGTCGACTCTGCAAGGCG  
185 CTTGCATGCATTAATGAATCGGCCCGCCAGGG  
186 ATTAAGTTCGCATCGTAACCGTGCGAGTAACA  
187 TAGATGGGGGGTAACGCCAGGGTTGTGCCAAG  
188 ACCCGTCGTCATATGTACCCCGGTAAAGGCTA  
189 CATGTCAAGATTCTCCGTGGGAACCGTTGGTG  
190 TCAGGTCACTTTTGCGGGAGAAGCAGAATTAG  
191 CTGTAATATTGCCTGAGAGTCTGGAAAACCTAG  
192 CAAAATTAAGTACGGTGTCTGGAAGAGGTCA  
193 TGCAACTAAGCAATAAAGCCTCAGTTATGACC  
194 TTTTTGCGCAGAAAACGAGAATGAATGTTTAG  
195 AAACAGTTGATGGCTTAGAGCTTATTTAAATA  
196 ACTGGATAACGGAACAACATTATTACCTTATG  
197 ACGAACTAGCGTCCAATACTGCGGAATGCTTT  
198 CGATTTTAGAGGACAGATGAACGGCGCGACCT  
199 CTTTGAAAAGAACTGGCTCATTATTTAATAAA  
200 GCTCCATGAGAGGCTTTGAGGACTAGGGAGTT  
201 ACGGCTACTTACTTAGCCGGAACGCTGACCAA  
202 AAAGGCCGAAAGGAACAACATAAGCTTTCCAG  
203 GAGAATAGCTTTTGCGGGATCGTCGGGTAGCA  
204 ACGTTAGTAAATGAATTTTCTGTAAGCGGAGT  
205 TTTTCGATGGCCCACTACGTAAACCGTC  
206 TATCAGGGTTTTTCGGTTTTGCGTATTGGGAACGCGCG  
207 GGGAGAGGTTTTTGTAACGACGGCCATTCCCAGT  
208 CACGACGTTTTTGTAAATGGGATAGGTCAAACGCGC  
209 GATTGACCTTTTGATGAACGGTAATCGTAGCAAACA  
210 AGAGAATCTTTTGGTTGTACCAAAAACAAGCATAAA  
211 AGAGAATCTTTTGGTTGTACCAAAAACAAGCATAAA  
212 ATATAATGTTTTTCATTGAATCCCCCTCAAATCGTCA  
213 TAAATATTTTTTGAAGAAAATCTACGACCAGTCA  
214 GGACGTTGTTTTTCATAAGGGAACCGAAAGGCGCAG  
215 ACGGTCAATTTTGACAGCATCGGAACGAACCCTCAG  
216 CAGCGAAAATTTTACTTTCAACAGTTTCTGGGATTTTGCTAAACTTTT  
Loop1 AACATCACTGCCTGAGTAGAAGAACT  
Loop2 TGTAGCAATACTTCTTTGATTAGTAAT  
Loop3 AGTCTGTCCATCACGCAAATTAACCGT

---

---

|        |                             |
|--------|-----------------------------|
| Loop4  | ATAATCAGTGAGGCCACCGAGTAAAAG |
| Loop5  | ACGCCAGAATCCTGAGAAGTGTTTTT  |
| Loop6  | TTAAAGGGATTTTAGACAGGAACGGT  |
| Loop7  | AGAGCGGGAGCTAAACAGGAGGCCGA  |
| Loop8  | TATAACGTGCTTTCCTCGTTAGAATC  |
| Loop9  | GTACTATGGTTGCTTTGACGAGCACG  |
| Loop10 | GCGCTTAATGCGCCGCTACAGGGCGC  |

---

**Table S2. Staple sequences for 2D triangular origami**

| Name | Sequence                                    |
|------|---------------------------------------------|
| A01  | CGGGGTTTCCTCAAGAGAAGGATTTTGAATTA            |
| A02  | AGCGTCATGTCTCTGAATTTACCGACTACCTT            |
| A03  | TTCATAATCCCCTTATTAGCGTTTTTCTTACC            |
| A04  | ATGGTTTATGTCACAATCAATAGATATTA AAC           |
| A05  | TTTGATGATTAAGAGGCTGAGACTTGCTCAGTACCAGGCG    |
| A06  | CCGGAACCCAGAATGGAAAGCGCAACATGGCT            |
| A07  | AAAGACAACATTTTCGGTCATAGCCAAAATCA            |
| A08  | GACGGGAGAATTA ACTCGGAATAAGTTTATTTCCAGCGCC   |
| A09  | GATAAGTGCCGTCGAGCTGAAACATGAAAGTATACAGGAG    |
| A10  | TGTACTGGAAATCCTCATTAAAGCAGAGCCAC            |
| A11  | CACCGGAAAGCGCGTTTTTCATCGGAAGGGCGA           |
| A12  | CATTCAACAAACGCAAAGACACCAGAACACCCTGAACAAA    |
| A13  | TTTAACGGTTCGGAACCTATTATTAGGGTTGATATAAGTA    |
| A14  | CTCAGAGCATATTCACAAACAAATTAATAAGT            |
| A15  | GGAGGGAATTTAGCGTCAGACTGTCCGCCTCC            |
| A16  | GTCAGAGGGTAATTGATGGCAACATATAAAAGCGATTGAG    |
| A17  | TAGCCCGGAATAGGTGAATGCCCCCTGCCTATGGTCAGTG    |
| A18  | CCTTGAGTCAGACGATTGGCCTTGCGCCACCC            |
| A19  | TCAGAACCCAGAATCAAGTTTGCCGGTAAATA            |
| A20  | TTGACGGAAATACATACATAAAGGGCGCTAATATCAGAGA    |
| A21  | CAGAGCCAGGAGGTTGAGGCAGGTAACAGTGCCCG         |
| A22  | ATTAAAGGCCGTAATCAGTAGCGAGCCACCCT            |
| A23  | GATAACCCACAAGAATGTTAGCAAACGTAGAAAATTATTC    |
| A24  | GCCGCCAGCATTGACACCACCCTC                    |
| A25  | AGAGCCGCACCATCGATAGCAGCATGAATTAT            |
| A26  | CACCGTCACCTTATTACGCAGTATTGAGTTAAGCCCAATA    |
| A27  | AGCCATTTAAACGTCACCAATGAACACCAGAACCA         |
| A28  | ATAAGAGCAAGAAACATGGCATGATTAAGACTCCGACTTG    |
| A29  | CCATTAGCAAGGCCGGGGGAATTA                    |
| A30  | GAGCCAGCGAATACCCAAAAGAACATGAAATAGCAATAGC    |
| A31  | TATCTTACCGAAGCCCAAACGCAATAATAACGAAAATCACCAG |
| A32  | CAGAAGGAAACCGAGGTTTTTAAGAAAAGTAAGCAGATAGCCG |
| A33  | CCTTTTTTCATTTAACAATTTTCATAGGATTAG           |
| A34  | TTTAACCTATCATAGGTCTGAGAGTTCCAGTA            |
| A35  | AGTATAAAATATGCGTTATACAAAGCCATCTT            |
| A36  | CAAGTACCTCATTCCAAGAACGGGAAATTCAT            |
| A37  | AGAGAATAACATAAAAACAGGGAAAGCGCATT            |
| A38  | AAAACAAAATTAATTAATGGAAACAGTACATTAGTGAAT     |
| A39  | TTATCAAACCGGCTTAGGTTGGGTAAAGCCTGT           |
| A40  | TTAGTATCGCCAACGCTCAACAGTCGGCTGTC            |
| A41  | TTTCCTTAGCACTCATCGAGAACAATAGCAGCCTTTACAG    |

---

A42 AGAGTCAAAAATCAATATATGTGATGAAACAAACATCAAG  
A43 ACTAGAAATATATAACTATATGTACGCTGAGA  
A44 TCAATAATAGGGCTTAATTGAGAATCATAATT  
A45 AACGTCAAAAATGAAAAGCAAGCCGTTTTTATGAAACCAA  
A46 GAGCAAAAGAAGATGAGTGAATAACCTTGCTTATAGCTTA  
A47 GATTAAGAAATGCTGATGCAAATCAGAATAAA  
A48 CACCGGAATCGCCATATTTAACAAAATTTACG  
A49 AGCATGTATTTTCATCGTAGGAATCAAACGATTTTTTGT  
A50 ACATAGCGCTGTAAATCGTCGCTATTCATTTCAATTACCT  
A51 GTTAAATACAATCGCAAGACAAAAGCCTTGAAA  
A52 CCCATCCTCGCCAACATGTAATTTAATAAGGC  
A53 TCCAATCCAAATAAGATTACCGCGCCCAATAAATAATAT  
A54 TCCCTTAGAATAACGCGAGAAAACCTTTTACCGACC  
A55 GTGTGATAAGGCAGAGGCATTTTCAGTCCTGA  
A56 ACAAGAAAGCAAGCAAATCAGATAACAGCCATATTATTTA  
A57 GTTTGAAATTCAAATATATTTTAG  
A58 AATAGATAGAGCCAGTAATAAGAGATTTAATG  
A59 GCCAGTTACAAAATAATAGAAGGCTTATCCGGTTATCAAC  
A60 TTCTGACCTAAAATATAAAGTACCGACTGCAGAAC  
A61 GCGCCTGTTATTCTAAGAACGCGATTCCAGAGCCTAATTT  
A62 TCAGCTAAAAAAGGTAAAGTAATT  
A63 ACGCTAACGAGCGTCTGGCGTTTTAGCGAACCCAACATGT  
A64 ACGACAATAAATCCCGACTTGCGGGAGATCCTGAATCTTACCA  
A65 TGCTATTTTGCACCCAGCTACAATTTTGTTTTGAAGCCTTAAA  
B01 TCATATGTGTAATCGTAAACTAGTCATTTTC  
B02 GTGAGAAAATGTGTAGGTAAAGATACAACCTT  
B03 GGCATCAAATTTGGGGCGCGAGCTAGTTAAAG  
B04 TTCGAGCTAAGACTTCAAATATCGGGAACGAG  
B05 ACAGTCAAAGAGAATCGATGAACGACCCCGGTTGATAATC  
B06 ATAGTAGTATGCAATGCCTGAGTAGGCCGGAG  
B07 AACCAGACGTTTAGCTATATTTTCTTCTACTA  
B08 GAATACCACATTCAACTTAAGAGGAAGCCCGATCAAAGCG  
B09 AGAAAAGCCCCAAAAGAGTCTGGAGCAAACAATCACCAT  
B10 CAATATGACCCTCATATATTTTAAAGCATTAA  
B11 CATCCAATAAATGGTCAATAACCTCGGAAGCA  
B12 AACTCCAAGATTGCATCAAAAAGATAATGCAGATACATAA  
B13 CGTTCTAGTCAGGTCATTGCCTGACAGGAAGATTGTATAA  
B14 CAGGCAAGATAAAAATTTTLAGAATATTCAAC  
B15 GATTAGAGATTAGATACATTTTCGCAAATCATA  
B16 CGCCAAAAGGAATTACAGTCAGAAGCAAAGCGCAGGTCAG  
B17 GCAAATATTTAAATTGAGATCTACAAAGGCTACTGATAAA  
B18 TTAATGCCTTATTTCAACGCAAGGGCAAAGAA  
B19 TTAGCAAATAGATTTAGTTTGACCAGTACCTT  
B20 TAATTGCTTTACCCTGACTATTATGAGGCATAGTAAGAGC  
B21 ATAAAGCCTTTGCGGGAGAAGCCTGGAGAGGGTAG

---

---

B22 TAAGAGGTCAATTCTGCGAACGAGATTAAGCA  
B23 AACACTATCATAACCCATCAAAAATCAGGTCTCCTTTTGA  
B24 ATGACCCTGTAATACTTCAGAGCA  
B25 TAAAGCTATATAACAGTTGATTCCCATTTTTG  
B26 CGGATGGCACGAGAATGACCATAATCGTTTACCAGACGAC  
B27 TAATTGCTTGGAAGTTTCATTCCAAATCGGTTGTA  
B28 GATAAAAACCAAAATATTAACAGTTCAGAAATTAGAGCT  
B29 ACTAAAGTACGGTGTCTGAATATAA  
B30 TGCTGTAGATCCCCCTCAAATGCTGCGAGAGGCTTTTGCA  
B31 AAAGAAGTTTTGCCAGCATAAATATTCATTGACTCAACATGTT  
B32 AATACTGCGGAATCGTAGGGGGTAATAGTAAAATGTTTAGACT  
B33 AGGGATAGCTCAGAGCCACCACCCCATGTCAA  
B34 CAACAGTTTATGGGATTTTGCTAATCAAAGG  
B35 GCCGCTTTGCTGAGGCTTGCAGGGGAAAAGGT  
B36 GCGCAGACTCCATGTTACTTAGCCCGTTTTAA  
B37 ACAGGTAGAAAGATTCATCAGTTGAGATTTAG  
B38 CCTCAGAACCGCCACCCAAGCCAATAGGAACGTAAATGA  
B39 ATTTTCTGTCAGCGGAGTGAGAATACCGATAT  
B40 ATTCGGTCTGCGGGATCGTCACCCGAAATCCG  
B41 CGACCTGCGGTCAATCATAAGGGAACGGAACAACATTATT  
B42 AGACGTTACCATGTACCGTAACACCCCTCAGAACCGCCAC  
B43 CACGCATAAGAAAGGAACAATAAGTCTTTCC  
B44 ATTGTGTCTCAGCAGCGAAAGACACCATCGCC  
B45 TTAATAAAACGAACATAACCGAACTGACCAACTCCTGATAA  
B46 AGGTTTAGTACCGCCATGAGTTTCGTCACCAGGATCTAAA  
B47 GTTTTGTCAGGAATTGCGAATAATCCGACAAT  
B48 GACAACAAGCATCGGAACGAGGGTGAGATTTG  
B49 TATCATCGTTGAAAGAGGACAGATGGAAGAAAAATCTACG  
B50 AGCGTAACTACAACTACAACGCCTATCACCGTACTCAGG  
B51 TAGTTGCGAATTTTTTTCACGTTGATCATAGTT  
B52 GTACAACGAGCAACGGCTACAGAGGATAACCGA  
B53 ACCAGTCAGGACGTTGGAACGGTGTACAGACCGAAACAAA  
B54 ACAGACAGCCCAAATCTCCAAAAAAAATTTCTTA  
B55 AACAGCTTGCTTTGAGGACTAAAGCGATTATA  
B56 CCAAGCGCAGGCGCATAGGCTGGCAGAACTGGCTCATTAT  
B57 CGAGGTGAGGCTCCAAAAGGAGCC  
B58 ACCCCCAGACTTTTTTCATGAGGAACTTGCTTT  
B59 ACCTTATGCGATTTTATGACCTTCATCAAGAGCATCTTTG  
B60 CGGTTTATCAGGTTTCCATTAAACGGGAATACACT  
B61 AAAACACTTAATCTTGACAAGAACTTAATCATTGTGAATT  
B62 GGCAAAAGTAAAATACGTAATGCC  
B63 TGGTTTAATTTCAACTCGGATATTCATTACCCACGAAAGA  
B64 ACCAACCTAAAAAATCAACGTAACAAATAAATTGGGCTTGAGA  
B65 CCTGACGAGAAACACCAGAACGAGTAGGCTGCTCATTAGTGA  
C01 TCGGGAGATATACAGTAACAGTACAAATAATT

---

---

C02 CCTGATTAAAGGAGCGGAATTATCTCGGCCTC  
C03 GCAAATCACCTCAATCAATATCTGCAGGTCGA  
C04 CGACCAGTACATTGGCAGATTCACCTGATTGC  
C05 TGGCAATTTTAAACGTCAGATGAAAACAATAACGGATTCTG  
C06 AAGGAATTACAAAGAAACCACCAGTCAGATGA  
C07 GGACATTCACCTCAAATATCAAACACAGTTGA  
C08 TTGACGAGCACGTATACTGAAATGGATTATTTAATAAAAAG  
C09 CCTGATTGCTTTGAATTGCGTAGATTTTCAGGCATCAATA  
C10 TAATCCTGATTATCATTTTGCGGAGAGGAAGG  
C11 TTATCTAAAGCATCACCTTGCTGATGGCCAAC  
C12 AGAGATAGTTTGACGCTCAATCGTACGTGCTTTCCTCGTT  
C13 GATTATACACAGAAATAAAGAAATACCAAGTTACAAAATC  
C14 TAGGAGCATAAAAGTTTGAGTAACATTGTTTG  
C15 TGACCTGACAAATGAAAAATCTAAAATATCTT  
C16 AGAATCAGAGCGGGAGATGGAAATACCTACATAACCCTTC  
C17 GCGCAGAGGCGAATTAATTATTTGCACGTAAATTCTGAAT  
C18 AATGGAAGCGAACGTTATTAATTTCTAACAAC  
C19 TAATAGATCGCTGAGAGCCAGCAGAAGCGTAA  
C20 GAATACGTAACAGGAAAAACGCTCCTAACAGGAGGCCGA  
C21 TCAATAGATATTAATCCTTTGCCGTTAGAACCT  
C22 CAATATTTGCCTGCAACAGTGCCATAGAGCCG  
C23 TAAAGGGATTTTAGATACCGCCAGCCATTGCGGCACAGA  
C24 ACAATTCGACAACCTCGTAATACAT  
C25 TTGAGGATGGTCAGTATTAACACCTTGAATGG  
C26 CTATTAGTATATCCAGAACAATATCAGGAACGGTACGCCA  
C27 CGCGAACTAAAACAGAGGTGAGGCTTAGAAGTATT  
C28 GAATCCTGAGAAGTGTATCGGCCTTGCTGGTACTTTAATG  
C29 ACCACCAGCAGAAGATGATAGCCC  
C30 TAAACATTAGAAGAACTCAAACCTTTTATAATCAGTGAG  
C31 GCCACCGAGTAAAAGAACATCACTTGCCTGAGCGCCATTA  
C32 TCTTTGATTAGTAATAGTCTGTCCATCACGCAAATTAACCGTT  
C33 CGCGTCTGATAGGAACGCCATCAACTTTTACA  
C34 AGGAAGATGGGGACGACGACAGTAATCATATT  
C35 CTCTAGAGCAAGCTTGCATGCCTGGTCAGTTG  
C36 CCTTACCCTGAGACGGGCAACAGCAGTCACA  
C37 CGAGAAAGGAAGGGAAGCGTACTATGGTTGCT  
C38 GCTCATTTTTTAACCAGCCTTCTGTAGCCAGGCATCTGC  
C39 CAGTTTGACGCACTCCAGCCAGCTAAACGACG  
C40 GCCAGTGCGATCCCCGGGTACCGAGTTTTTCT  
C41 TTTACCAGCCTGGCCCTGAGAGAAAGCCGGCGAACGTGG  
C42 GTAACCGTCTTTTCATCAACATTAATAATTTTTGTTAAATCA  
C43 ACGTTGTATTCCGGCACCGCTTCTGGCGCATC  
C44 CCAGGGTGGCTCGAATTCGTAATCCAGTCACG  
C45 TAGAGCTTGACGGGGAGTTGCAGCAAGCGGTCATTGGGCG  
C46 GTTAAAATTCGCATTAATGTGAGCGAGTAACACACGTTGG

---

---

|       |                                             |
|-------|---------------------------------------------|
| C47   | TGTAGATGGGTGCCGGAAACCAGGAACGCCAG            |
| C48   | GGTTTTCCATGGTCATAGCTGTTTGAGAGGCG            |
| C49   | GTTTGCGTCACGCTGGTTTGCCCCAAGGGAGCCCCGATT     |
| C50   | GGATAGGTACCCGTCGGATTCTCCTAAACGTTAATATTTT    |
| C51   | AGTTGGGTCAAAGCGCCATTCGCCCCGTAATG            |
| C52   | CGCGCGGGCCTGTGTGAAATTGTTGGCGATTA            |
| C53   | CTAAATCGGAACCCTAAGCAGGCGAAAATCCTTCGGCCAA    |
| C54   | CGGCGGATTGAATTCAGGCTGCGCAACGGGGGATG         |
| C55   | TGCTGCAAATCCGCTCACAATTCCCAGCTGCA            |
| C56   | TTAATGAAGTTTGTATGGTGGTTCCGAGGTGCCGTAAAGCA   |
| C57   | TGGCGAAATGTTGGGAAGGGCGAT                    |
| C58   | TGTCGTGCACACAACATACGAGCCACGCCAGC            |
| C59   | CAAGTTTTTTGGGGTCGAAATCGGCAAATCCGGGAAACC     |
| C60   | TCTTCGCTATTGGAAGCATAAAGTGTATGCCCGCT         |
| C61   | TTCCAGTCCTTATAAATCAAAGAGAACCATCACCCAAAT     |
| C62   | GCGCTCACAAGCCTGGGGTGCCTA                    |
| C63   | CGATGGCCCACTACGTATAGCCCGAGATAGGGATTGCGTT    |
| C64   | AACTCACATTATTGAGTGTGTTCAGAAACCGTCTATCAGGG   |
| C65   | ACGTGGACTCCAACGTCAAAGGGCGAATTTGGAACAAGAGTCC |
| L-A1C | TTAATTAATTTTTTACCATATCAAA                   |
| L-A2C | TTAATTTTCATCTTAGACTTTACAA                   |
| L-A3C | CTGTCCAGACGTATACCGAACGA                     |
| L-A4C | TCAAGATTAGTGTAGCAATACT                      |
| L-B1A | TGTAGCATTCCTTTTATAAACAGTT                   |
| L-B2A | TTAATTGTATTTCCACCAGAGCC                     |
| L-B3A | ACTACGAAGGCTTAGCACCATTA                     |
| L-B4A | ATAAGGCTTGCAACAAAGTTAC                      |
| L-C1B | GTGGGAACAAATTTCTATTTTTGAG                   |
| L-C2B | CGGTGCGGGCCTTCCAAAAACATT                    |
| L-C3B | ATGAGTGAGCTTTTAAATATGCA                     |
| L-C4B | ACTATTAAAGAGGATAGCGTCC                      |

---



**Table S3. Staple sequences for 3D cuboid origami**

| Name | Sequence                                                 |
|------|----------------------------------------------------------|
| 1    | TAATAGTAATAATGCTTTTTACG                                  |
| 2    | TGGCTTAGAAAATCAGCAGCATCG                                 |
| 3    | GAAAACGAAATTACGAATTGTGTC                                 |
| 4    | ATGCAGATGAGTAGTATGCCCTGA                                 |
| 5    | AGTTTCGTAGGAACCCTCAAGAGATTATCCGG                         |
| 6    | AAAAGGCTAAAGTATTAACAAATCGTCAAAA                          |
| 7    | GGCTACAGCAGACGATGGCATTTTAGATAGCC                         |
| 8    | TCCATGTTGTCAGACTTGAGGGAGACAAAAGG                         |
| 9    | AGTCCTGAGCGCCTGTGTTATAACAACATTTTG                        |
| 10   | GGCGTTTTAAAAGCCTACCTCCGGAGCAGAAG                         |
| 11   | TTACAGAGTAGGTCTGAACAAAATCGTCAATA                         |
| 12   | AGGAAACCAGATGATGCCTACCATTTCTGAAT                         |
| 13   | AAGTGTGTTGGAACGGTGGGAAGAAGAGAGGGTTCTACAAA                |
| 14   | AATGGATTCCGGCGAATGAGTGTTAATCAGCTGGAACGCC                 |
| 15   | GCGGTCAGCAAAAAGAACGGCCAACCTCAGGAAGCTTTCCG                |
| 16   | ATTTAGAAGTCGTGCCACTCTAGACCAAGCTTGCATGCCT                 |
| 17   | AGCCCAATCACCAGTATAATAATTGTAGCTCATTTGCGGA                 |
| 18   | GCGAAAGAGTCTTTACACAGTTCA                                 |
| 19   | CCTGATAAGGCATAGTTTCAACTA                                 |
| 20   | AAGTAAGCCGGTCATACCTTTAGCACTTAGCCATAAGGCTAATTGGGCTTGAGATG |
| 21   | TGCAGAACACAAGAAATAGAAGGCAGGATTAGGAAACATGCCAAAAGG         |
| 22   | TTGTTTAAAAATCCTCAGGCAGGTAGGCTTTG                         |
| 23   | ATTAGAGCTAATTACAGCAAAAAGAGAGGAAACCGCCAAAGGGAAGGTA        |
| 24   | TTTAGACATTATAATCAAATACCTAATTCTTATTACTAGAAGCGAACC         |
| 25   | GAACCACCCTTAGGTTCAAAAATCAAGAATAAC                        |
| 26   | CGACGACAGTATCGGCGCGCGGGGGAAACCTGTATTAGAGATTATACATCAAAAAT |
| 27   | TGACCCTGTAATGCCGAGCGAAAGGGGGAAAGATTTACAT                 |
| 28   | CATTAAATTTTTGTTAGTTCCAGTTTATAAATTATTAACA                 |
| 29   | GCACCGCTGGCCAGTGGGATCCCC                                 |
| 30   | TCCCGACTATTATTCTGATTAGCGATTGCGAACAAACTACGTGGCATCAATTCTAC |
| 31   | AGCCTTTAAGGTCATTACATGTTT                                 |
| 32   | AGGACTAATGCTTTAACCTGACTA                                 |
| 33   | AATATTGATTCAGTGAGGAACGAGATACCACAAAGAGCAA                 |
| 34   | TGGCAGATAATCATAACCAGTATAATCAGATAAATAATATGGATAGCA         |
| 35   | ATAAAAACGGAGGTTGATTAAAGCCCTCAGCA                         |
| 36   | TATTTGCATTTACCAGGCAATAATCAAGTTTGGCCCCCTTTATCATCG         |
| 37   | GGCTATCAGGTCATTGAGCTTGACGAGCGGGCGCTCATGGAGTGAGGCTCAGCTAA |
| 38   | CCGCCTGCGAATTTATGGGTTATAACGATTTT                         |
| 39   | GGGTACCGATTGTTTGCTTTACAATTACCTGATTTAACAATTTAAGAA         |
| 40   | TGATAAATTAATACTTAAAGGGAT                                 |
| 41   | ATCAAAAATAATTCGCAAAAATCCCTTGGAACATACCGAAC                |
| 42   | AAAACGACTCTGGTGCTCCAGTCGAGAGGCGGACTAATAG                 |
| 43   | TAAATATGCTGAAAAGAACGCCTG                                 |
| 44   | TTATAGTCTTGATAAGATTGTATC                                 |
| 45   | CACTATCACCTCAAAAAGACTTTT                                 |

---

46 GTTTAATTATTTAGGAGCGCAGAC  
47 CTAAAGGAGGGTTTTGATTTTCAGCCCATCCT  
48 ATCGTCACCAGAATGGCGGAACCTTGCGGGAG  
49 GAGATTTGATTAGCGTCATTGACAAGGGAAGC  
50 GCTGCTCACGGAAATTGACAGAATAACGGAAT  
51 GCAAGCAAAAGCCAACCAACATGTCACCGAGT  
52 AATAAGAATAACTATAAACACCGGTCACCAGT  
53 AAGCCCTTTTTCATTTTCAATAGTAACAGTGC  
54 TCATATGGCGTAAAACCATTTCAAACAATTCG  
55 GGAAAAACGCTAGGGCGGCCGATTTTGCGGGAGAAGCCTT  
56 ATTAAAAAAGAGTCCACGATTTAGCCTGAGAGGTTCTAGC  
57 CACTAACATTTGCGTAAAATCGGCGTCTGGCCAAAATTCG  
58 TAATCCTGAGCTCGAAGCCCGCTTCGGAAACCTGAGGGGA  
59 GCGCGAGCAACTAAAAGGAACAA  
60 TGCTCCTTAGAAGCAATTTGCGGG  
61 TTGAATCCTAACCCCTCGTACAACG  
62 CAGTTGAGTCAACTTTGTAACAAA  
63 TAGCATTCCCACCCTCCTCAGTACGCCAATA  
64 GGTTTATCGCCTATTTAAAGCGCACCAATCCA  
65 TCATGAGGGCCGCCAGTTGCCATCTCTTACCG  
66 GGTC AATCTCAGTAGCATT CATTATAGAAAAT  
67 AATTTACGACAATAAAGCTCAACATTGCAACA  
68 GTTTTGAATAAGAATATGTAAATGACATCGCC  
69 GCATTAGAGAGAAGAGGAATTACCTTTAGGAG  
70 ACCCAAAAGAATTATTAGAAATAACATCAATA  
71 AAAAGAGTAAACAGGAGCTGGCAAATTCAACCTCTGGAGC  
72 CACACGACGGAGCCCCCTATTTAAAATTTTGTTTTCTGT  
73 CACGCTGATGGTTCCGTTGGGCGCTGCCAGTTAGGCAAAG  
74 ACAACTCGCGCTCACTTTTCGTAATCCAGTCACGACGTTGT  
75 CAGAGCCACACAGACAGAATAGAAGTACGGTGCCTTAAT  
76 AGGCCGCTAGCGGATTAATATTCA  
77 GAAACAAAGTTTACCAAGATTCAT  
78 AATAGCTATTTTCATACACCGTAAATAAGGGAAAATCAACAATCATTGTGAATTAC  
79 AGACGACGAGCATGTAATTACCGCCAGGCGGATGCCCCCTAGCTTGCT  
80 TATTTATCGTCTCTGACCAGAGCCAAGTTTCC  
81 AAAATATCTTTTTTAAGCAGAGGCGAACTGGCACAATCAAAGGTGAA  
82 CGGGAGCTCTGTCCATGCCAGCCAGTAGGGCTGCGTTAAAGCCTTAAA  
83 GCCCTAAACTGATGCAAAGACGCTCGGGAGAA  
84 ATCGTAACCGTGCATCCAGGGTGGTTGCGTTGTATTTAAATTGGCAATTAGAAATTG  
85 TATTTCAAATATGATGTGTAGCGCCCTAAAGCAGTAATA  
86 AATTGTAAACGTTAATGAACGTGGTTTGATGGGAGCCAGC  
87 CGCCATTCGGGTTTTCCATGGTCA  
88 TCAAGATTACAGTTAATAAGTGCCCGGAGTGAGCCCTCATCTATATTTTCATTTGG  
89 TTCGAGGTAGAGAGTATCTGGAAG  
90 ATTAAACGTCGTCATAGCATCAA  
91 TTATCACCCATTACCCACCGAACTAGGTAGAAGACGACGA  
92 AAAGGGACTAAATAAGTAATTGAGTAGGAATCGAAACCAAGCCACCCT  
93 TTA ACTGAA ACCCAATTTACCGGGAGTTAA  
94 CGTAGATTATTTTGTCATGATTAAGATAGCAGATCAAATCCAAGCGC

---

---

95 AAACAAGAGAATCGATAATCGGAAGTCACGCTATATTACCCACGCAAATTCTGTCC  
96 AGCAAATGCTTAGATTAATCCAATAGCCATAT  
97 TAGCTGTTTCAGATGACCTTTGCCAAAATCGCTGGAAACAGAAATAGC  
98 TCACCATCCGCAAGGAAATCAGAG  
99 GCCAGCTTTCATCAACAAATCCTGACTCCAACAACCTGATA  
100 TAACGCCAGCCATTCACACATTAATTTTTCTTGTTATCT  
101 TTTCATTCCCTGTTTAGAGTTAGCG  
102 AAGATTAATCAGGATTGAATTTCT  
103 TAAAAACCCTGCGGAAGGTAAAAT  
104 CTTATGCGATTATTACGACCAACT  
105 AGTTTCAGGTTCGAGAGTCAGAACCTCAATAAT  
106 GCTTGCAGTTCCAGTACCGTATAAAGTTGCTA  
107 CGATTATACACCGGAAGCCACCAGACACCCTG  
108 CGGATATTGTCACCGAAAACCATCGACTCCTT  
109 TTTCATCGAATCGCCATAAAGTAATTAACCGT  
110 AAATAAACCGCAAGACCCGTGTGAATTCTGGC  
111 GAAACAATGTACATAAAGCGATAGAAAAATCT  
112 ATAAGTTTTTCAGGTTCAAGTTACCGAACGTT  
113 CCAGAACAGCGCGTAACTCGTTAGTAAAAATTTTTAGAAC  
114 AATGCGCGGTCAAAGGAAGCACTAGAACGGTACAGTCAAA  
115 TTGAGGAATTCACCAGGCAGGCGAATTAATGAATATTTA  
116 CCTGATTATCCTGTGTAGCTAACTGGCTGCGCATGGGCGC  
117 TCAATAACCATATAACCTTTCAAC  
118 CCAACAGGGAGGAAGCTCGCTGAG  
119 GTCCAATAAAAAATAGCACCCCCAG  
120 GGAACAACATTTTAAGACAAGAAC  
121 TAACGATCCGCCACCCGGTTGATAGTTTTTAT  
122 TAAACAGCAACAGTGCAGCGTCATCAGTTACA  
123 ACGTAATGTCAGAGCCCCAGAGCCAAGAGCAA  
124 TTGAAAGACACCAATGCTTGAGCCACCACGGA  
125 CGGCTGTCACAAAAGGTATTTAACGGTAATAT  
126 TTTTGCACAATACCGAAAAGAACGTAGTCTTT  
127 AACAAAGTGAAAACATATCAATATGAAAGGAA  
128 ATTACGCATTGAATACTAACGTCAATCATATT  
129 TGTAGCAAGTGCTTTCCACCACAGCCGGAGAATCGTAAA  
130 CAACAGAGGTGCCGTAGCGAAAAATATAAGCATGAGCGAG  
131 AAAGCATCTTGCCCCATGAGACGGTGGTGTAGAACTGTTG  
132 ATTAATTTAATGAGTGGAATTGTAGGCGATTAAGTTGGG  
133 CTCAGAACTAAAGTTTCTAAACAAAGTTGATTAGCAAACCT  
134 ATATTCCGGCCGAAAGATGGATAGC  
135 CATCTTTGGAGAGGCTGAACTAAC  
136 CCAATAATACCACCGGGGAAACGTGGACAGATTAATCTTGAACCTGGCTCATTATAC  
137 AAGTACCGTTTCCTTAAGCAAGCCTAAGTATACCTTGAGTTTGATACC  
138 TAATTTGCACATGGCTCACCACCCCCACTACG  
139 CAACAGTTATGTGAGTTGATTGCTGTATGTTAGCAAAGACATTTGGGA  
140 CGTATAACTACTTCTTGCTTGCTAACGCCAATGGTTTGACCAGCTAC  
141 ATGGCTATCGAGAAAAGAATCCTTCAGAGGGT  
142 ATGGGATAGGTCACGTGCAACAGCGGGTGCCTTAAAAGTTGAATTATCGATGAATA  
143 CCTCATATTGAGAAAGCCC GCCGCGGGTCGAGATAGAACC

---

---

144 AAAAACAGGAAGATTGCCGTCTATACGCTGGTACCTTGCT  
145 GGAAGGGCGTGCTGCATATCCGCT  
146 AATTTTATGGTCAGTGGCCGGAAGGATTTTGTGTCGTCTTACATTTTCGCAAATGG  
147 GATAGTTGAGACCGGACCCAATTC  
148 AAGGCACCGTTTAGACCTTCAAAT  
149 ATTAGAGCATCAAGAGGAACGGTGAATAAAACTTTGCAA  
150 CTTCTGACAAATTTAACATGTAATCGAGAACATCATTCCACCGCCACC  
151 AATTGAGCCTCAGAGCTTTGATGATAACCGAT  
152 TACAGTAAAAAGAAACGCAAACGTGCAAGGCCAACCGCCTAAAACACT  
153 ACTAGCATGTCAATCAGTTTTTTGGCTTAATGAACTATCGTGATTAGTAGAATATA  
154 GAACCTCATTCCCTTACTTTTTACCAGAGCC  
155 CACAATTCAAGGAGCGTGAGTAACGATTCGCCGAATAACCAGTTAAGC  
156 CAAAAGGGATTTTAAAGACGAGCA  
157 TAACAACCCGTCGGATAGCGGTCCCAGGGCGAATTTTTGA  
158 AGGGGGATGATCGGTGAAAGCCTGTGATTGCCTGGCAAAT  
159 TGCGAACGCCATTAGATTCCAGAC  
160 ATCGCGTTAGCGAACCCGCCGACA  
161 AGAAGTTTAGTAAAATAACCTAAA  
162 CAGTCAGGTCTACGTTTACAGACC  
163 TCTGTATGTAGGTGTAGTTTAGTAAGAACGGG  
164 CCCACGCATACAGGAGTTTAAACGGCCTGAATC  
165 AATACACTCCCTCAGACCGCCACCGCTAATAT  
166 TGACCTCCAGCAAATACCATTAAGAAAATA  
167 GCACTCATTTAGGCAGGTAATAAGAATAACAT  
168 GCGTCTTTAATATATTTCTGACCTCTGAAAGC  
169 AAGAATTGTTGCTTCTAATTAATTAATATCAA  
170 AACATATACAGTACCTCAATAACGATTATCAT  
171 AGAACTCACGCCGCTAGTTGCTTTTGCAATGCCTGAGTAA  
172 CAGACAATTGGCCCACCAAATCAATATGTACCTAAAGATT  
173 TGGTCAGTCTTACCGTTGCAGCATCTCCGTGAAAGCCCC  
174 ACCACCAGCACAACTAAAGTGTGCGGGCCTCTGACCGTA

---

**Table S4. Sequences of the Probe/Index strands for 2D rectangular origami** (Given below are the sequences of all the modified strands. Note that unmodified helper strands are replaced by these modified helper strands to assemble the rectangular origami for functional assay)

B-93-1 GAGCAAAAACCTTCTGA TGAGGTAGTCTGTCAGGTCC  
 B-93-2 ACGCTCGGTCAGGATCTTCA ATAATGGAAGAAGGAG  
 B-95-1 CGGAATTATTGAAAGG TGAGGTAGTCTGTCAGGTCC  
 B-95-2 ACGCTCGGTCAGGATCTTCA AATTGAGGTGAAAAAT  
 B-97-1 CTAAGCAAGATAGAA TGAGGTAGTCTGTCAGGTCC  
 B-97-2 ACGCTCGGTCAGGATCTTCA CCCTTCTGAATCGTCT

| Name   | Sequence                                                        |
|--------|-----------------------------------------------------------------|
| I-175  | CCAGGCGCTTAATCATTCTCTTTTGAGGAACAAGTTTCTTGT<br>TGTGAATTACAGGTAG  |
| I-177  | TTTCATGAAAATTGTGTCCTCTTTTGAGGAACAAGTTTCTTGT<br>TCGAAATCTGTACAGA |
| I-198  | CGATTTTAGAGGACAGTCCTCTTTTGAGGAACAAGTTTCTTGT<br>ATGAACGGCGCGACCT |
| I-199  | CTTTGAAAAGAACTGGTCCTCTTTTGAGGAACAAGTTTCTTGT<br>CTCATTATTTAATAAA |
| I-200  | GCTCCATGAGAGGCTTTCCTCTTTTGAGGAACAAGTTTCTTGT<br>TGAGGACTAGGGAGTT |
| I-201  | ACGGCTACTTACTTAGTCCTCTTTTGAGGAACAAGTTTCTTGT<br>CCGGAACGCTGACCAA |
| C-76-1 | TATCACCGTACTCAGG CTGGCTCAAC GAACTGAACC                          |
| C-76-2 | ACTTGCATCA GGTTCTCGGC AGGTTTAGCGGGGTTT                          |
| C-77-1 | TGCTCAGTCAGTCTCT CTGGCTCAAC GAACTGAACC                          |
| C-77-2 | ACTTGCATCA GGTTCTCGGC GAATTTACCAGGAGGT                          |
| C-79-1 | TGAGGCAGGCGTCAGA CTGGCTCAAC GAACTGAACC                          |
| C-79-2 | ACTTGCATCA GGTTCTCGGC CTGTAGCGTAGCAAGG                          |
| C-81-1 | CCGGAACACACCACG CTGGCTCAAC GAACTGAACC                           |
| C-81-2 | ACTTGCATCA GGTTCTCGGC GAATAAGTAAGACTCC                          |
| C-83-1 | TTATTACGGTCAGAGG CTGGCTCAAC GAACTGAACC                          |
| C-83-2 | ACTTGCATCA GGTTCTCGGC GTAATTGAATAGCAGC                          |
| C-85-1 | CTTTACAGTTAGCGAA CTGGCTCAAC GAACTGAACC                          |
| C-85-2 | ACTTGCATCA GGTTCTCGGC CCTCCCGACGTAGGAA                          |
| C-87-1 | TCATTACCCGACAATA CTGGCTCAAC GAACTGAACC                          |
| C-87-2 | ACTTGCATCA GGTTCTCGGC AACAACATATTTAGGC                          |
| C-89-1 | AGAGGCATAATTTTCAT CTGGCTCAAC GAACTGAACC                         |
| C-89-2 | ACTTGCATCA GGTTCTCGGC CTTCTGACTATAACTA                          |
| C-91-1 | TATGTAAACCTTTTTT CTGGCTCAAC GAACTGAACC                          |
| C-91-2 | ACTTGCATCA GGTTCTCGGC AATGGAAAAATTACCT                          |
| C-93-1 | GAGCAAAAACCTTCTGA CTGGCTCAAC GAACTGAACC                         |
| C-93-2 | ACTTGCATCA GGTTCTCGGC ATAATGGAAGAAGGAG                          |
| C-95-1 | CGGAATTATTGAAAGG CTGGCTCAAC GAACTGAACC                          |
| C-95-2 | ACTTGCATCA GGTTCTCGGC AATTGAGGTGAAAAAT                          |
| C-97-1 | CTAAGCAAGATAGAA CTGGCTCAAC GAACTGAACC                           |
| C-97-2 | ACTTGCATCA GGTTCTCGGC CCCTTCTGAATCGTCT                          |
| B-76-1 | TATCACCGTACTCAGG GGTGAGCTGGCGGCGGGTGT                           |

---

|        |                                        |
|--------|----------------------------------------|
| B-76-2 | CGCGGCGATATCATCATCCA AGGTTTAGCGGGGTTT  |
| B-77-1 | TGCTCAGTCAGTCTCT GGTGAGCTGGCGGCGGGTGT  |
| B-77-2 | CGCGGCGATATCATCATCCA GAATTTACCAGGAGGT  |
| B-79-1 | TGAGGCAGGCGTCAGA GGTGAGCTGGCGGCGGGTGT  |
| B-79-2 | CGCGGCGATATCATCATCCA CTGTAGCGTAGCAAGG  |
| B-81-1 | CCGAAACACACCACG GGTGAGCTGGCGGCGGGTGT   |
| B-81-2 | CGCGGCGATATCATCATCCA GAATAAGTAAGACTCC  |
| B-83-1 | TTATTACGGTCAGAGG GGTGAGCTGGCGGCGGGTGT  |
| B-83-2 | CGCGGCGATATCATCATCCA GTAATTGAATAGCAGC  |
| B-85-1 | CTTTACAGTTAGCGAA GGTGAGCTGGCGGCGGGTGT  |
| B-85-2 | CGCGGCGATATCATCATCCA CCTCCCGACGTAGGAA  |
| B-87-1 | TCATTACCCGACAATA GGTGAGCTGGCGGCGGGTGT  |
| B-87-2 | CGCGGCGATATCATCATCCA AACAACATATTTAGGC  |
| B-89-1 | AGAGGCATAATTTTCAT GGTGAGCTGGCGGCGGGTGT |
| B-89-2 | CGCGGCGATATCATCATCCA CTTCTGACTATAACTA  |
| B-91-1 | TATGTAAACCTTTTTT GGTGAGCTGGCGGCGGGTGT  |
| B-91-2 | CGCGGCGATATCATCATCCA AATGGAAAAATTACCT  |
| B-93-1 | GAGCAAAAACTTCTGA GGTGAGCTGGCGGCGGGTGT  |
| B-93-2 | CGCGGCGATATCATCATCCA ATAATGGAAGAAGGAG  |
| B-95-1 | CGGAATTATTGAAAGG GGTGAGCTGGCGGCGGGTGT  |
| B-95-2 | CGCGGCGATATCATCATCCA AATTGAGGTGAAAAAT  |
| B-97-1 | CTAAAGCAAGATAGAA GGTGAGCTGGCGGCGGGTGT  |
| B-97-2 | CGCGGCGATATCATCATCCA CCCTTCTGAATCGTCT  |

---

Sequence of synthetic  $\beta$ -actin RNA:

rArCrA rCrCrC rGrCrC rGrCrC rArGrC rUrCrA rCrCrA rUrGrG rArUrG rArUrG rArUrA rUrCrG  
rCrCrG rCrG
